# Supplementary material
Source: ML conference proceedings conference paper supplement (https://proceedings.mlr.press/v119/nazarov20a.html)
Supplement: Supplementary file 1 [file nazarov20a-supp.pdf]

## A. MNIST-like Experiments

The plots presented in this appendix support the conclusions made in the main text and provide an overview of the experiments conducted on MNIST-like datasets.

Each figure shows the compression-accuracy trade-off of a particular method and input features for *SimpleConvModel* and *TwoLayerDenseModel* models for all four of the studied datasets (described in the main text): EMNIST-Letters on the *top-left*, KMNIST – *top-right*, Fashion MNIST – *bottom-left*, and MNIST on the *bottom-right*. Figures 7, 8, 9, and 10 present  $\mathbb{R}$  and  $\mathbb{C}$  models with *the same intermediate feature sizes*.

We compare  $\mathbb{R}$  networks against  $\frac{1}{2}\mathbb{C}$  with half the number of parameters for raw input features on figures 13, and 14, and  $2\mathbb{R}$  with double the number of parameters against  $\mathbb{C}$  for Fourier input features on figures 11 and 12.

## B. Complex-valued Local Reparameterization

In this section we show (11).

By  $e_i \in \mathbb{R} \mapsto \mathbb{C}$  we denote the  $i$ -th unit vector of dimensionality *conforming* to the matrix-vector expression it is used in,  $[M]$  denotes *row-major* flattening of a matrix  $M$  into a vector, i.e. in lexicographic order of its indices. Furthermore  $\text{diag}(\cdot)$  embeds vectors into matrices with zeros everywhere except the diagonal, and  $\otimes$  is the Kronecker product, for which we note the following identities  $[PQR] = (P \otimes R^\top)[Q]$ ,  $(P \otimes Q)^\top = (P^\top \otimes Q^\top)$ , and  $(P \otimes R)(C \otimes S) = PQ \otimes RS$  (Petersen and Pedersen, 2012).

If we assume a factorized  $\mathbb{C}$ -Gaussian approximation (10) for  $W \in \mathbb{C}^{n \times m}$ , then  $[W]$  is  $\mathbb{C}$ -Gaussian vector with

$$[W] \sim \mathcal{CN}_{nm}([\mu], \text{diag}[\Sigma], \text{diag}[C]), \quad (17)$$

where with  $C_{ij} = \Sigma_{ij}\xi_{ij}$ ,  $\Sigma_{ij} \geq 0$ , and  $|C_{ij}|^2 \leq \Sigma_{ij}$ . Then for any  $x \in \mathbb{C}^m$  and  $b \in \mathbb{C}^n$  we have  $y = Wx + b = (I_n \otimes x^\top)[W] + b$ , whence the covariance and relation matrices of  $y$  are

$$\begin{aligned} (I_n \otimes x^\top) \text{diag}[\Sigma] (I_n \otimes x^\top)^\top &= \sum_{ij} (I_n \otimes x^\top) \left( (e_i \otimes e_j) \Sigma_{ij} (e_i \otimes e_j)^\top \right) (I_n \otimes x^\top)^\top \\ &= \sum_{ij} (e_i \otimes x^\top e_j) \Sigma_{ij} (e_i \otimes x^\top e_j)^\top \\ &= \sum_{i=1}^n (e_i e_i^\top) \left\{ \sum_{j=1}^m \Sigma_{ij} |x_j|^2 \right\}, \end{aligned} \quad (18)$$

$$\begin{aligned} (I_n \otimes x^\top) \text{diag}[C] (I_n \otimes x^\top)^\top &= \sum_{ij} (I_n \otimes x^\top) \left( (e_i \otimes e_j) C_{ij} (e_i \otimes e_j)^\top \right) (I_n \otimes x^\top)^\top \\ &= \sum_{i=1}^n (e_i e_i^\top) \left\{ \sum_{j=1}^m C_{ij} x_j^2 \right\}. \end{aligned} \quad (19)$$

Since (18) and (19) are diagonal, the vector  $y$  has independent univariate  $\mathbb{C}$ -Gaussian components, whence (11) follows.

## C. Backpropagation through $\mathbb{C}$ -networks

Wirtinger ( $\mathbb{C}\mathbb{R}$ ) calculus relies on the natural identification of  $\mathbb{C}$  with  $\mathbb{R}^2$ , and regards  $f: \mathbb{C} \rightarrow \mathbb{C}$  as an algebraically equivalent function  $F: \mathbb{R}^2 \rightarrow \mathbb{C}$  defined  $f(z) = f(u + jv) = F(u, v)$ . It enables general treatment of functions of vector  $\mathbb{C}$ -argument that possess partial derivatives with respect to real and imaginary parts, yet are not required to satisfy Cauchy-Riemann conditions. In  $\mathbb{C}\mathbb{R}$  calculus the complex argument  $z$  and its conjugate  $\bar{z}$  act as independent variables and  $f(z)$  is treated as  $f(z, \bar{z})$  by way of geometric transformations  $z = u + jv$  and  $\bar{z} = u - jv$ .

Wirtinger partial derivative operators are formally defined as  $\frac{\partial}{\partial z} = \frac{1}{2} \left( \frac{\partial}{\partial u} - j \frac{\partial}{\partial v} \right)$  and  $\frac{\partial}{\partial \bar{z}} = \frac{1}{2} \left( \frac{\partial}{\partial u} + j \frac{\partial}{\partial v} \right)$  and differentials are  $dz = du + jdv$  and  $d\bar{z} = du - jdv$ . In this paradigm The usual rules of calculus, like chain and product rules, follow

directly from the definition of the operators, e.g.

$$\frac{\partial(f \circ g)}{\partial z} = \frac{\partial f(g(z))}{\partial g} \frac{\partial g(z)}{\partial z} + \frac{\partial f(g(z))}{\partial \bar{g}} \frac{\partial \bar{g}(z)}{\partial z}.$$

The total differential of  $f$  at  $z = u + jv \in \mathbb{C}$  is

$$\begin{aligned} df(z) &= \frac{\partial f}{\partial z} dz + \frac{\partial f}{\partial \bar{z}} d\bar{z} \\ &= \frac{1}{2} \left( \frac{\partial F}{\partial u} du - j \frac{\partial F}{\partial v} du + j \frac{\partial F}{\partial u} dv + \frac{\partial F}{\partial v} dv \right) + \frac{1}{2} \left( \frac{\partial F}{\partial u} du + j \frac{\partial F}{\partial v} du - j \frac{\partial F}{\partial u} dv + \frac{\partial F}{\partial v} dv \right) \\ &= dF(u, v), \end{aligned}$$

At the same time the Cauchy-Riemann conditions  $-j \frac{\partial F}{\partial v} = \frac{\partial F}{\partial u}$  can be expressed as  $\frac{\partial f}{\partial \bar{z}} = 0$ . Thus  $\mathbb{C}\mathbb{R}$  calculus subsumes the usual  $\mathbb{C}$ -calculus of holomorphic functions, since  $f(z) = f(z, \bar{z})$  is constant with respect to  $\bar{z}$  in the latter.

In optimization-related tasks the objective is  $f: \mathbb{C} \rightarrow \mathbb{R}$ , meaning that if it were to satisfy the Cauchy-Riemann conditions, then it necessarily should have been constant. Nevertheless, the expression of the  $\mathbb{C}\mathbb{R}$  gradient is compatible with what is expected, when  $f$  is treated like a  $\mathbb{R}^2$  function. For such  $f$  we have  $\bar{f} = f$ , which implies  $\frac{\partial f}{\partial \bar{z}} = \frac{\partial \bar{f}}{\partial \bar{z}} = \frac{\partial f}{\partial z}$ , whence

$$df = \frac{\partial f}{\partial z} dz + \frac{\partial f}{\partial \bar{z}} d\bar{z} = \frac{\partial f}{\partial z} dz + \overline{\frac{\partial f}{\partial z}} dz = 2\Re\left(\frac{\partial f}{\partial z} dz\right).$$

Therefore the gradient of  $f$  at  $z$  is given by  $\nabla_{\bar{z}} f(z) = \frac{\partial f}{\partial z} = \frac{\partial F}{\partial u} + j \frac{\partial F}{\partial v}$ . The identification  $\mathbb{C} \simeq \mathbb{R}^2$ , backed by Wirtinger calculus, and emulation of  $\mathbb{C}$ -arithmetic in computational graphs with  $\mathbb{R}$ -valued operations makes it possible to reuse  $\mathbb{R}$  back-propagation and existing auto-differentiation frameworks.

## D. Gradient of the KL-divergence in $\mathbb{R}$ case

In this appendix we study the approximation proposed by Molchanov et al. (2017) for the KL divergence term (4) for  $\mathbb{R}$  Sparse Variational Dropout. Following the logic of Lapidath and Moser (2003) we derive the expression for  $\frac{d}{d \log \alpha} K(\alpha)$ . Acknowledging that the same result was obtained by Hron et al. (2018, eq. (5)), we provide this appendix for the sake of completeness.

For  $(z_i)_{i=1}^m \sim \mathcal{N}(0, 1)$  iid and  $(\mu_i)_{i=1}^m \in \mathbb{R}$ , the random variable  $W = \sum_i (\mu_i + z_i)^2$  has non-central  $\chi^2$  distribution with shape  $m$  and non-centrality parameter  $\lambda = \sum_i \mu_i^2$ , i.e.  $W \sim \chi_m^2(\lambda)$ . Therefore, the divergence (4) has the form

$$K(\alpha) \propto \frac{1}{2} \mathbb{E}_{W \sim \chi_m^2(\lambda)} \log W. \quad (4')$$

$W$  can alternatively be represented as a Poisson mixture of ordinary  $\chi^2$  distributions: if  $Z_{|J} \sim \chi_{m+2J}^2$  for  $J \sim \text{Pois}(\frac{\lambda}{2})$  then  $W \sim Z$ . Therefore, expanding the conditional expectation gives

$$\mathbb{E}_{W \sim \chi_m^2(\lambda)} \log W = \mathbb{E}\left(\mathbb{E}(\log W \mid J)\right) = \mathbb{E}_{J \sim \text{Pois}(\frac{\lambda}{2})} \left(\mathbb{E}_{W \sim \chi_{m+2J}^2} \log W\right). \quad (20)$$

Since  $\chi_{\nu}^2$  is Gamma distribution  $\Gamma(\frac{\nu}{2}, \frac{1}{2})$ , it can be shown that the logarithmic moment  $\mathbb{E}_{W \sim \chi_{\nu}^2} \log W$  is  $\psi(\frac{\nu}{2}) - \log \frac{1}{2}$ , where  $\psi$  is the digamma function ( $\psi(x) = \frac{d}{dx} \log \Gamma(x)$ ). By expanding expectation of a Poisson random variable we get  $\mathbb{E}_{W \sim \chi_m^2(\lambda)} \log W = \log 2 + g_m(\frac{\lambda}{2})$ , where

$$g_m(x) = e^{-x} \sum_{j \geq 0} \frac{x^j}{j!} \psi\left(\frac{m+2j}{2}\right). \quad (21)$$

Making use of the property  $\psi(z+1) = \psi(z) + \frac{1}{z}$  of the digamma function for  $z > 0$ , we conclude that the power series in (21) converges for any  $x \geq 0$ . Therefore the derivative of (21) is given by

$$\frac{d}{dx} g_m(x) = -g_m(x) + e^{-x} \sum_{j \geq 0} \frac{x^j}{j!} \left( \psi\left(\frac{m+2j}{2}\right) + \frac{2}{m+2j} \right). \quad (22)$$

By manipulating the partial sums within (22) we get

$$\frac{d}{dx}g_m(x) = e^{-x} \sum_{j \geq 0} \frac{x^j}{j!} \frac{1}{j + \frac{m}{2}} = e^{-x} x^{-\frac{m}{2}} \sum_{j \geq 0} \frac{1}{j!} \int_0^x t^{j + \frac{m}{2} - 1} dt. \quad (23)$$

Furthermore, the functions  $t \mapsto \sum_{j=0}^J \frac{1}{j!} t^{j + \frac{m}{2} - 1}$  are non-decreasing on  $(0, x)$  with growing  $J$  and converge to  $t^{\frac{m}{2} - 1} e^t$ , which implies by the Monotone Convergence Theorem that

$$\frac{d}{dx}g_m(x) = e^{-x} x^{-\frac{m}{2}} \int_0^x \sum_{j \geq 0} \frac{1}{j!} t^{j + \frac{m}{2} - 1} dt = e^{-x} x^{-\frac{m}{2}} \int_0^x t^{\left(\frac{m}{2} - 1\right)} e^t dt. \quad (24)$$

Substituting  $u^2 = t$  on  $[0, \infty]$  with  $2udu = dt$  and letting  $I_m : x \mapsto e^{-x^2} \int_0^x u^{m-1} e^{u^2} du$  yields

$$\frac{d(20)}{d\lambda} = \frac{1}{2} \frac{d}{dx}g_m(x) \Big|_{x=\frac{\lambda}{2}} = e^{-x} x^{-\frac{m}{2}} \int_0^{\sqrt{x}} u^{m-1} e^{u^2} du \Big|_{x=\frac{\lambda}{2}} = \left(\sqrt{\frac{2}{\lambda}}\right)^m I_m\left(\sqrt{\frac{\lambda}{2}}\right). \quad (25)$$

Since  $\alpha$  is non-negative, it is typically parameterized via its logarithm, whence the derivative of (4') with respect to  $\log \alpha$  follows from (25) for  $m = 1$  and  $\lambda = \frac{1}{\alpha}$ :

$$\frac{dK(\alpha)}{d \log \alpha} = -\frac{1}{\sqrt{2\alpha}} I_1\left(\frac{1}{\sqrt{2\alpha}}\right). \quad (26)$$

We compute the Monte-Carlo estimate of (4) on a sample of  $10^7$  draws over an equally spaced grid of  $\log \alpha$  in  $[-12, +12]$  of size 4096. The approximation proposed by Molchanov et al. (2017) is given in (27), with coefficients  $k_1 = 0.63576$ ,  $k_2 = 1.8732$ , and  $k_3 = 1.48695$ . The derivative of the approximation with respect to  $\log \alpha$  follows (26) within 4% of relative tolerance, see fig. 15.

$$(4) \approx \frac{1}{2} \log(1 + e^{-\log \alpha}) + k_1 \sigma(-(k_2 + k_3 \log \alpha)), \quad (27)$$

Similarly, the forward difference estimate of the derivative (26) very closely (up to sampling error). For sake of completeness, we compute a similar Monte-Carlo estimate for the KL divergence term in (13') for  $\mathbb{C}$ -valued Variational Dropout with  $\beta = 2$ , fit the best approximation (27), and compare it against the exact  $\log \alpha$  derivative  $\frac{d(13')}{d \log \alpha} = e^{-\frac{1}{\alpha}} - 1$ .

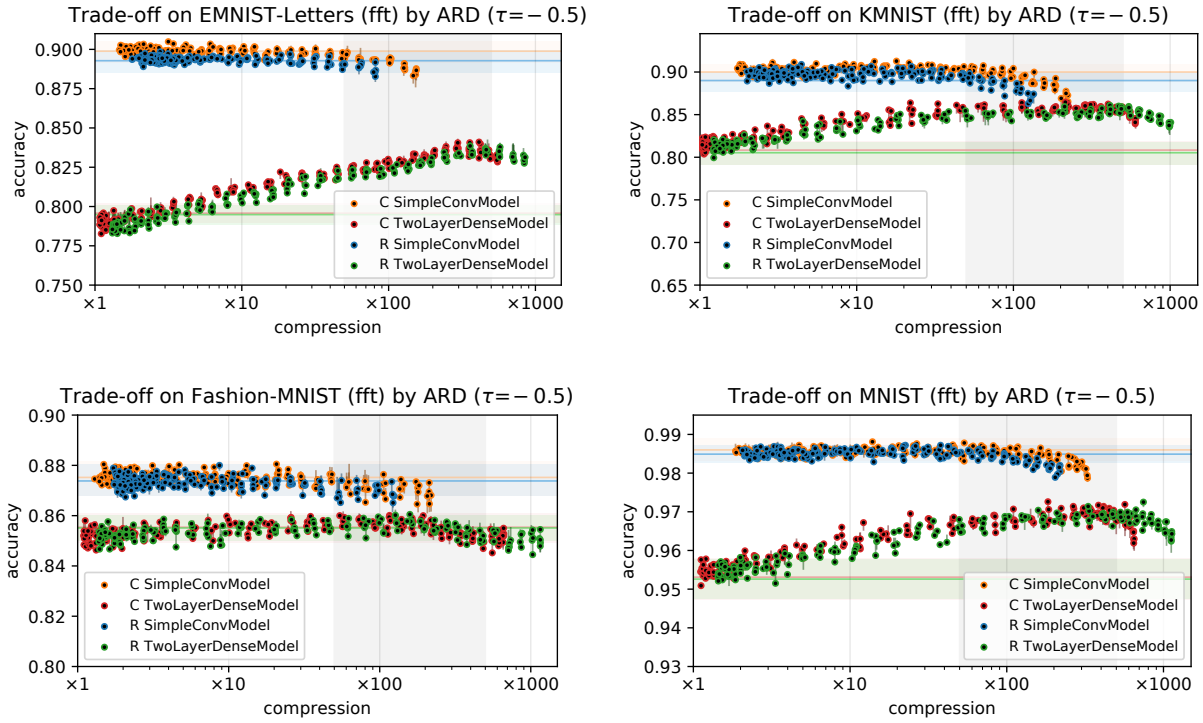

Figure 7. The trade-off of ARD method for  $\mathbb{R}$  and  $\mathbb{C}$  models using Fourier features.

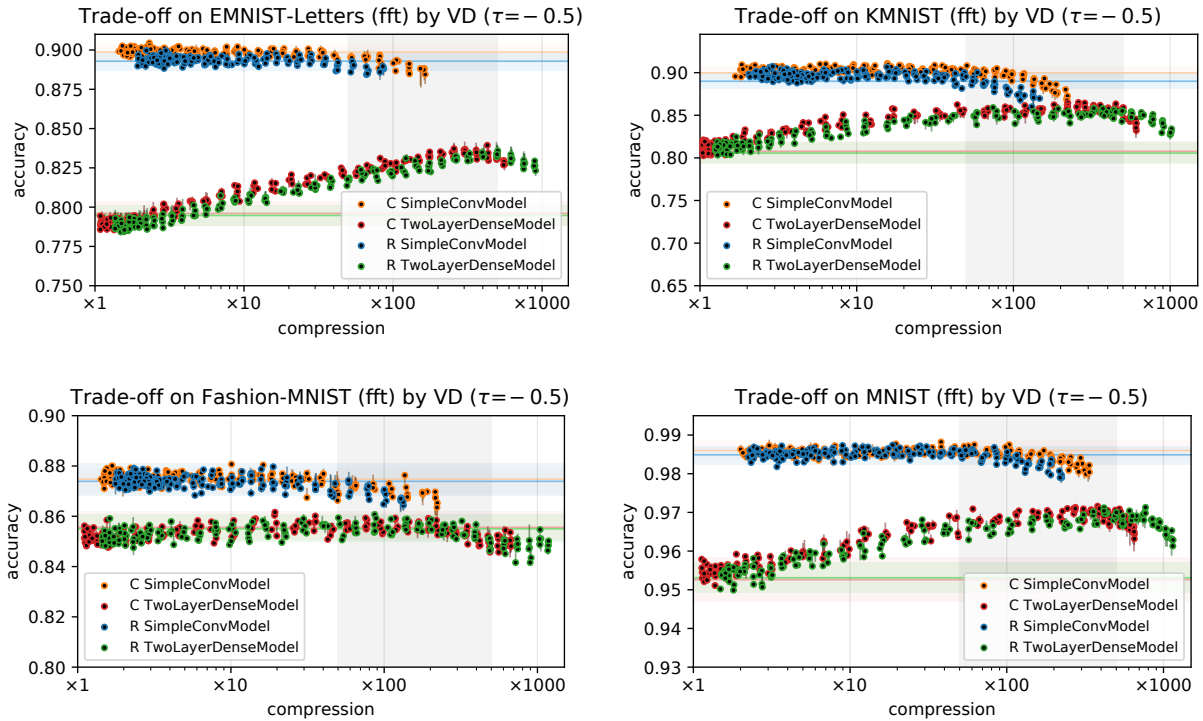

Figure 8. The trade-off of VD method for  $\mathbb{R}$  and  $\mathbb{C}$  models using Fourier features.

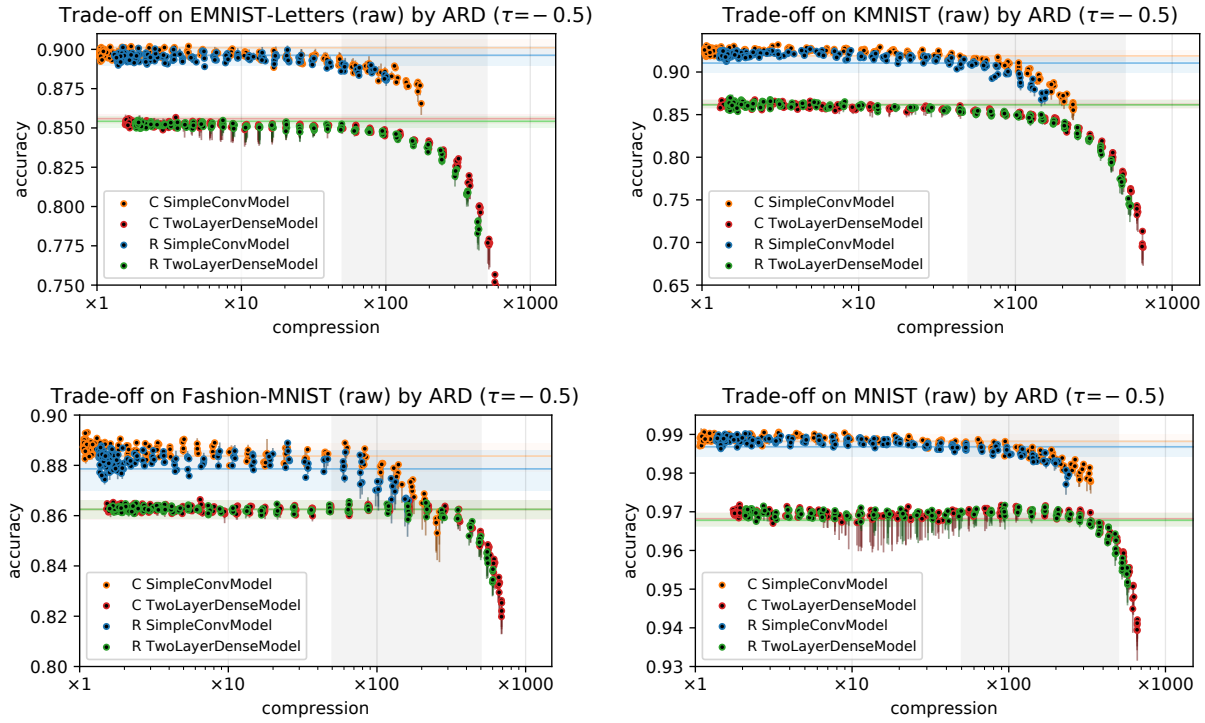

Figure 9. The trade-off of ARD method for  $\mathbb{R}$  and  $\mathbb{C}$  models using raw features.

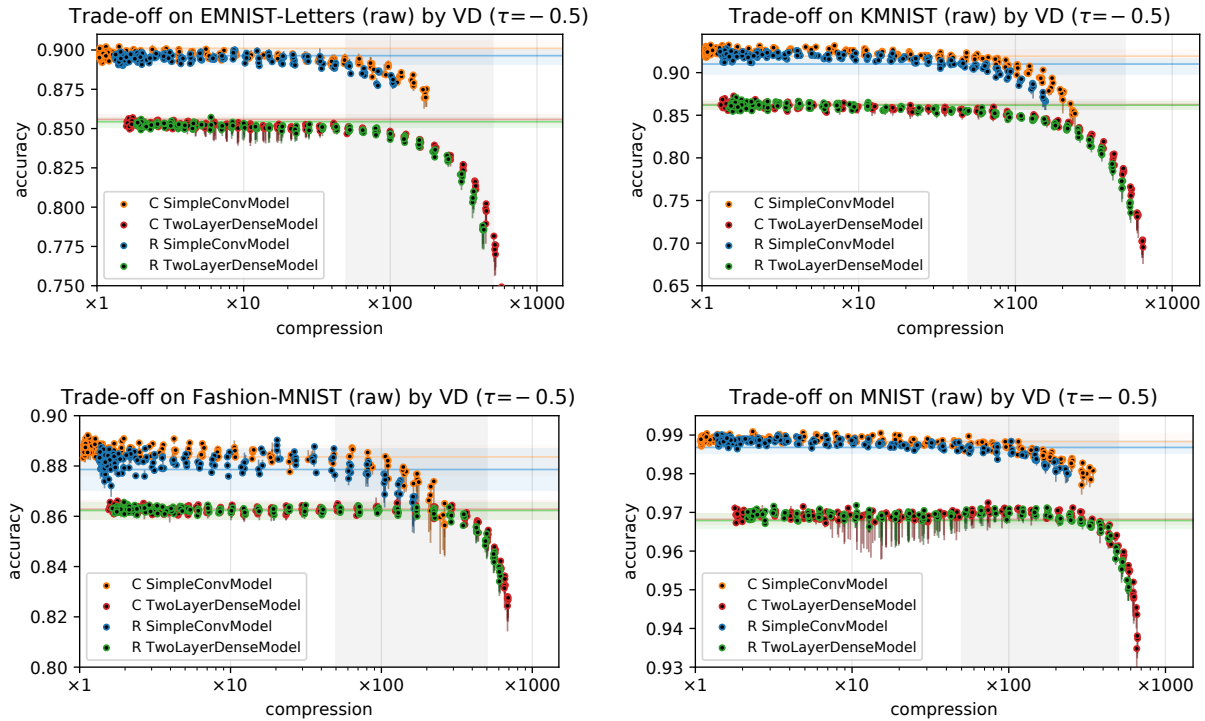

Figure 10. The trade-off of VD method for  $\mathbb{R}$  and  $\mathbb{C}$  models using raw features.

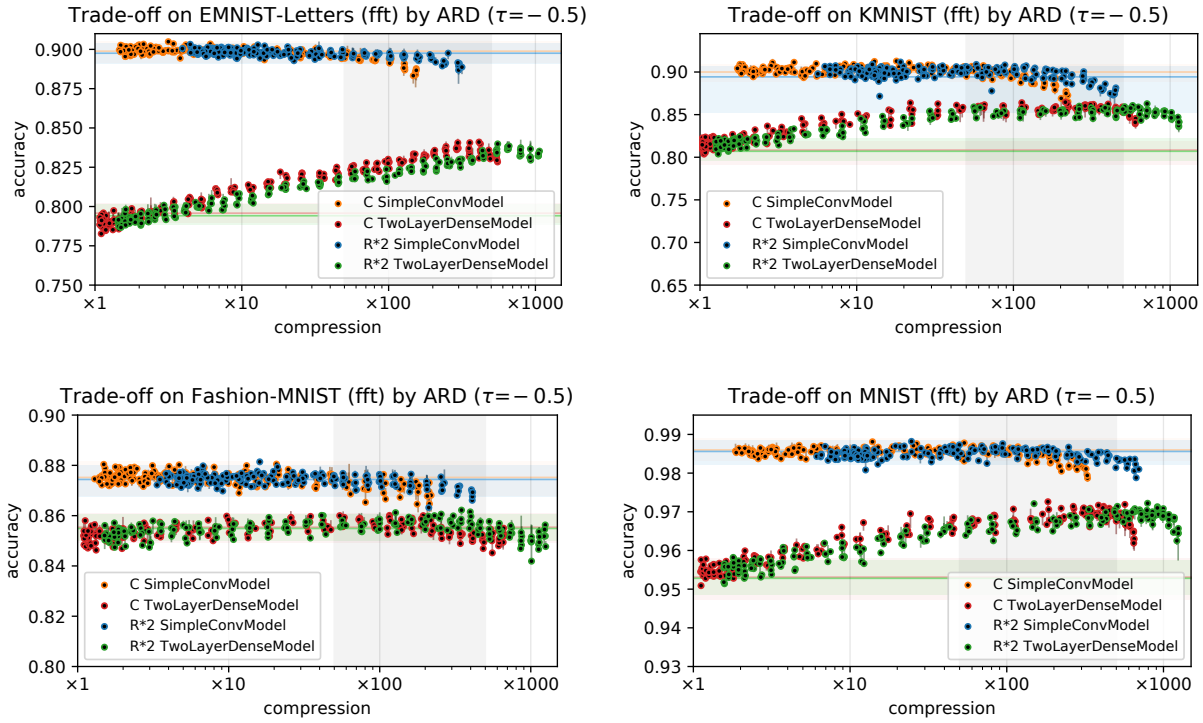

Figure 11. The trade-off of ARD method for  $2\mathbb{R}$  and  $\mathbb{C}$  models using Fourier features.

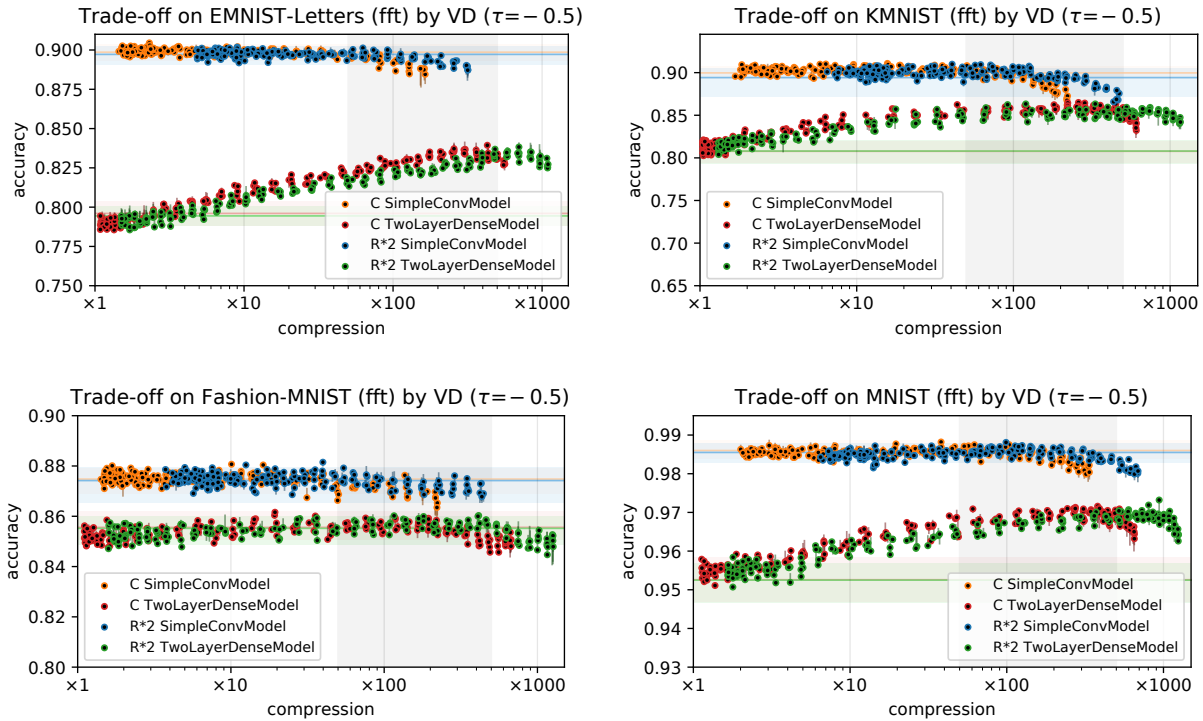

Figure 12. The trade-off of VD method for  $2\mathbb{R}$  and  $\mathbb{C}$  models using Fourier features.

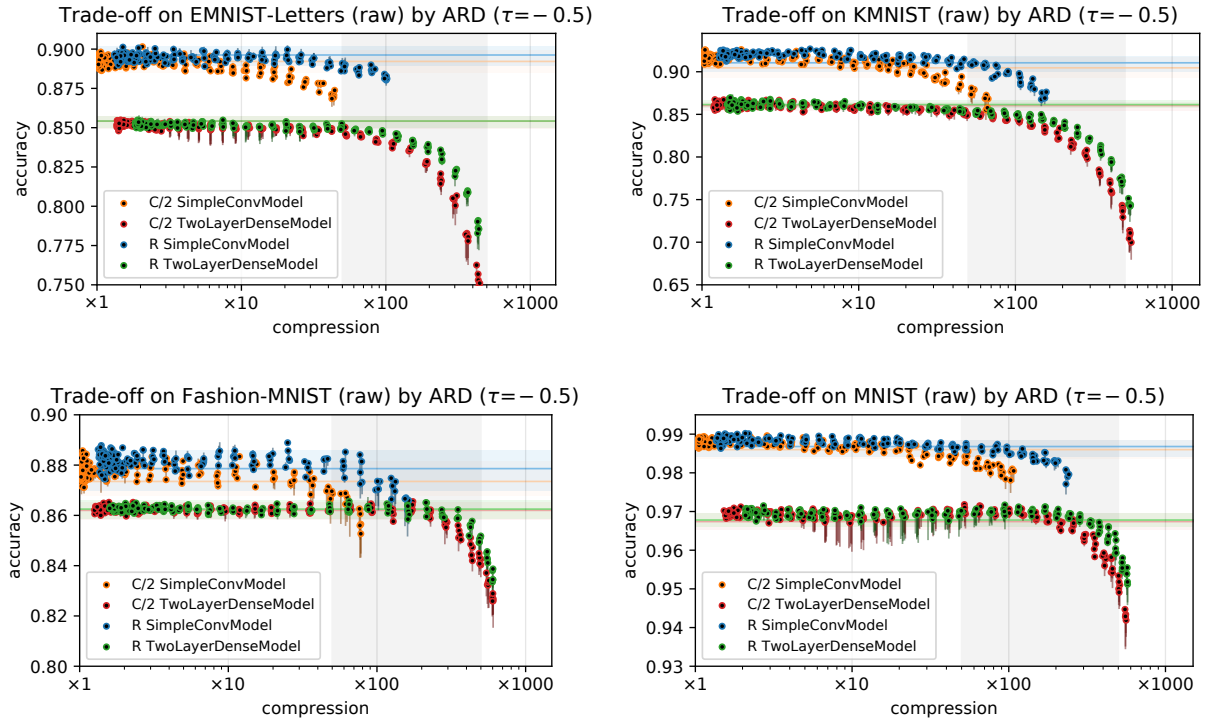

Figure 13. The trade-off of ARD method for  $\mathbb{R}$  and  $\frac{1}{2}\mathbb{C}$  models using raw features.

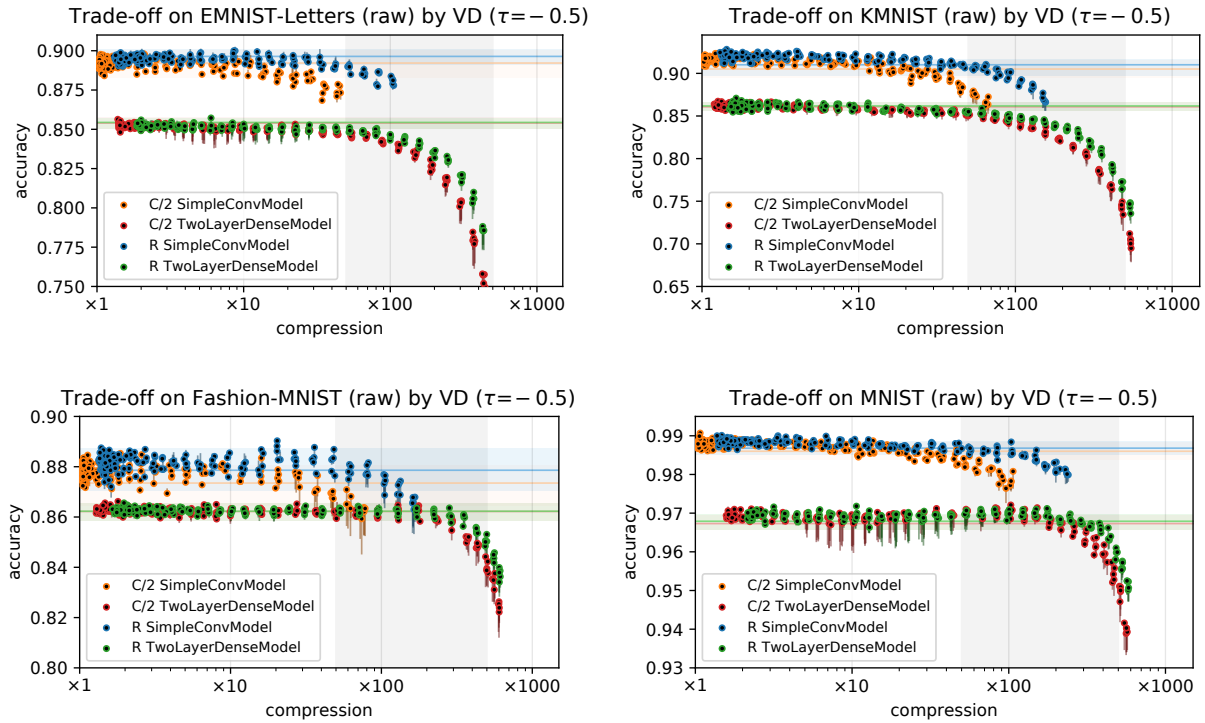

Figure 14. The trade-off of VD method for  $\mathbb{R}$  and  $\frac{1}{2}\mathbb{C}$  models using raw features.

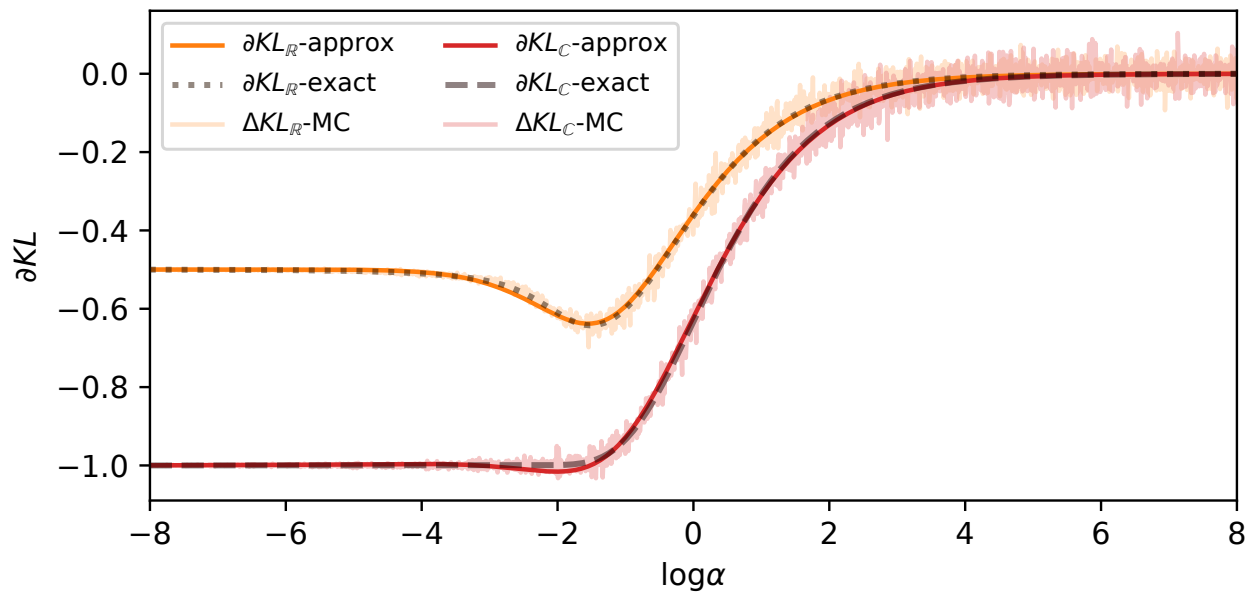

Figure 15.  $\frac{dK(\cdot)}{d \log \alpha}$  of the approximation (27), MC estimate of (4), and the exact derivative using (26).
